# Supplementary material for: Safety and Feasibility of Radiation Therapy Combined with CDK 4/6 Inhibitors in the Management of Advanced Breast Cancer
Source: MDPI journal article supplement (doi:10.3390/cancers15030690), 2023-01-22
Supplement: s1 [file s1]

**Table S1.** Univariate regression analysis - Cox regression model for CDK4/6i dose reduction.

| Variable          |                                 | HR    | 95 CI      | P value           |
|-------------------|---------------------------------|-------|------------|-------------------|
| Age               | <50 (ref) vs. ≥50               | 0.63  | 0.33-1.22  | 0.17              |
| ECOG              | 0 (ref) vs. 1                   | 2.22  | 1.07-4.61  | <b>0.03</b>       |
|                   | 0 (ref) vs. 2                   | 1.08  | 0.37-3.10  | 0.89              |
| Disease           | De novo (ref) vs. Recurrent     | 1.13  | 0.58-2.20  | 0.71              |
| Previous CHT      | Yes (ref) vs. No                | 1.21  | 0.64-2.29  | 0.56              |
| Line of treatment | First (ref) vs. Second          | 0.93  | 0.46-1.89  | 0.85              |
| CDK4/6i           | Rib (ref) vs. Palb              | 1.06  | 0.53-2.11  | 0.88              |
|                   | Rib (ref) vs. Abem              | 0.39  | 0.05-2.88  | 0.36              |
| RT                | Concurrent (ref) vs. Sequential | 0.60  | 0.32-1.15  | 0.13              |
| RT area           | Bone (ref) vs. Not-bone         | 1.63  | 0.84-3.17  | 0.15              |
| Neutr in C1D14    | G0 (ref) vs. G1-2               | 1.85  | 0.87-3.97  | 0.11              |
|                   | G0 (ref) vs. G3-4               | 3.84  | 1.62-9.13  | <b>0.002</b>      |
| Neutr in C2D1     | G0 (ref) vs. G1-2               | 2.29  | 0.65-8.07  | 0.20              |
|                   | G0 (ref) vs. G3-4               | 16.11 | 4.73-54.92 | <b>&lt; 0.001</b> |

Abbreviations: ref – reference; ECOG - Performance status assessed by Eastern Cooperative Oncology; CHT – chemotherapy; CDK4/6i - Cyclin-dependent kinase 4 and 6 inhibitors; RT – radiotherapy; Neutr – neutropenia; 0-no neutropenia; 1-neutropenia G1; 2-neutropenia G2; 3-neutropenia G3; 4-neutropenia G4; Rib – ribociclib; Palb – palbociclib; Abem – abemaciclib;

**Table S2.** Multivariate regression analysis - Cox regression model for CDK4/6i dose reduction. Variables with p ≤ 0.2 in the univariate regression analysis were chosen for this analysis.

| Variable       |                                 | HR    | 95 CI       | P value           |
|----------------|---------------------------------|-------|-------------|-------------------|
| Age            | <50 (ref) vs. ≥50               | 0.96  | 0.48-1.22   | 0.92              |
| ECOG           | 0 (ref) vs. 1                   | 3.13  | 1.37-7.12   | <b>0.007</b>      |
|                | 0 (ref) vs. 2                   | 1.88  | 0.56-6.30   | 0.31              |
| RT             | Concurrent (ref) vs. Sequential | 0.96  | 0.48-1.94   | 0.91              |
| RT area        | Bone (ref) vs. Not-bone         | 1.95  | 0.97-3.95   | 0.06              |
| Neutr in C1D14 | G0 (ref) vs. G1-2               | 0.38  | 0.14-1.00   | 0.05              |
|                | G0 (ref) vs. G3-4               | 1.14  | 0.40-3.29   | 0.81              |
| Neutr in C2D1  | G0 (ref) vs. G1-2               | 2.99  | 0.82-10.94  | 0.10              |
|                | G0 (ref) vs. G3-4               | 39.90 | 9.33-170.66 | <b>&lt; 0.001</b> |

Abbreviations: ref – reference; ECOG - Performance status assessed by Eastern Cooperative Oncology; RT – radiotherapy; Neutr – neutropenia; 0-no neutropenia; 1-neutropenia G1; 2-neutropenia G2; 3-neutropenia G3; 4-neutropenia G4;
